# Supplementary material for: Telehealth Delivery of Mental Health Services: An Analysis of Private Insurance Claims Data in the United States
Source: Atypon-hosted journal article supplement (doi:10.1176/appi.ps.201700017), 2017-09-01
Supplement: appi.ps.201700017.ds001.pdf [file appi.ps.201700017.ds001.pdf]

## ONLINE SUPPLEMENT

**eTable 1. Number of telehealth claims for mental health and substance abuse services by provider specialty, HCCI 2009-13**

| Provider category          | Total  | 2009  | 2010  | 2011  | 2012  | 2013  |
|----------------------------|--------|-------|-------|-------|-------|-------|
| Clinical Psychology        | 1,950  | 159   | 167   | 327   | 514   | 783   |
| Mental Health Professional | 1,416  | 61    | 98    | 200   | 371   | 686   |
| Psychiatry                 | 9,868  | 884   | 1,086 | 1,523 | 2,251 | 4,124 |
| Social Worker              | 246    | *     | 28    | 22    | 68    | 122   |
| Total                      | 13,480 | 1,110 | 1,379 | 2,072 | 3,204 | 5,715 |

HCCI, Health Care Cost Institute

\* denotes cell size of less than 10 observations

**eTable 2. Number of telehealth claims mental health and substance abuse services by state and year, HCCI 2009 and 2013**

| State                | 2009 | 2013 |
|----------------------|------|------|
| Alaska               | *    | *    |
| Alabama              | 16   | 305  |
| Arkansas             | *    | 62   |
| Arizona              | 98   | 260  |
| California           | 12   | 50   |
| Colorado             | *    | 69   |
| Connecticut          | *    | *    |
| District of Columbia | *    | 45   |
| Delaware             | *    | *    |
| Florida              | *    | 70   |
| Georgia              | 15   | 326  |
| Hawaii               | *    | *    |
| Iowa                 | 47   | 225  |
| Idaho                | *    | *    |
| Illinois             | *    | 55   |
| Indiana              | *    | 95   |
| Kansas               | *    | 90   |
| Kentucky             | 147  | 316  |
| Louisiana            | *    | 46   |
| Massachusetts        | *    | *    |
| Maryland             | 20   | *    |
| Maine                | *    | 57   |
| Michigan             | *    | 82   |
| Minnesota            | 204  | 570  |
| Missouri             | 27   | 344  |
| Mississippi          | *    | *    |
| Montana              | *    | 17   |
| North Carolina       | 48   | 114  |

| State          | 2009 | 2013 |
|----------------|------|------|
| North Dakota   | 10   | 42   |
| Nebraska       | *    | 39   |
| New Hampshire  | *    | *    |
| New Jersey     | *    | *    |
| New Mexico     | *    | 31   |
| Nevada         | 25   | 24   |
| New York       | *    | 327  |
| Ohio           | *    | 45   |
| Oklahoma       | 59   | 166  |
| Oregon         | *    | *    |
| Pennsylvania   | *    | 50   |
| Rhode Island   | *    | *    |
| South Carolina | *    | 25   |
| South Dakota   | *    | 21   |
| Tennessee      | 43   | 711  |
| Texas          | 94   | 536  |
| Utah           | *    | *    |
| Virginia       | 43   | 197  |
| Vermont        | *    | *    |
| Washington     | 94   | *    |
| Wisconsin      | 30   | 359  |
| West Virginia  | *    | 20   |
| Wyoming        | *    | 11   |
| N/A            | 39   | 76   |

HCCI, Health Care Cost Institute; N/A, not available

\* denotes cell size of less than 10 observations

**eTable 3. Patient distribution by sex stratified by telehealth and non-telehealth mental health and substance abuse services, HCCI 2009-13**

| Sex    | MH/SA services via telehealth | MH/SA services via non-telehealth | P-value <sup>a</sup> |
|--------|-------------------------------|-----------------------------------|----------------------|
|        | Number (%)                    | Number (%)                        |                      |
| Male   | 5,289 (39.23)                 | 1,738,676 (43.77)                 | <.001                |
| Female | 8,193 (60.77)                 | 2,233,621 (56.23)                 | <.001                |

MH/SA, Mental health and substance abuse; HCCI, Health Care Cost Institute

<sup>a</sup> Estimated using test of proportions.

**eTable 4: Patient age distribution stratified by telehealth and non-telehealth mental health and substance abuse services, HCCI 2009-13**

| Age group | MH/SA services via telehealth | MH/SA services via non-telehealth | P-value <sup>a</sup> |
|-----------|-------------------------------|-----------------------------------|----------------------|
|           | Number (%)                    | Number (%)                        |                      |
| 0-17      | 1,390 (8.03)                  | 599,281 (11.72)                   | <.001                |
| 18-24     | 673 (3.89)                    | 309,530 (6.05)                    | .019                 |
| 25-34     | 833 (4.81)                    | 442,335 (8.65)                    | <.001                |
| 35-44     | 1,940 (11.21)                 | 617,106 (12.07)                   | .246                 |
| 45-54     | 3,754 (21.69)                 | 803,864 (15.72)                   | <.001                |
| 55-64     | 3,683 (21.28)                 | 805,865 (15.76)                   | <.001                |
| 65-74     | 2,468 (14.26)                 | 788,959 (15.43)                   | .108                 |
| 75-84     | 1,723 (9.96)                  | 523,280 (10.23)                   | .712                 |
| 85+       | 841 (4.86)                    | 223,205 (4.37)                    | .488                 |

MH/SA, Mental health and substance abuse; HCCI, Health Care Cost Institute

<sup>a</sup> Estimated using test of proportions.



**eTable 5. Number (percent) of claims and average reimbursements and charges by CPT code for telehealth and non-telehealth claims for mental health and substance abuse services, HCCI 2009-13**

| CPT codes | Description                                                                                       | Telehealth      |                   |             |                                | Non-Telehealth     |                   |             |                                |
|-----------|---------------------------------------------------------------------------------------------------|-----------------|-------------------|-------------|--------------------------------|--------------------|-------------------|-------------|--------------------------------|
|           |                                                                                                   | Number (%)      | Reimbursement, \$ | Charges, \$ | % of Reimbursements to Charges | Number (%)         | Reimbursement, \$ | Charges, \$ | % of Reimbursements to Charges |
| 90862     | Visit focused on monitoring and prescribing of psychopharmacologic agents                         | 4485<br>(33.27) | 22.81             | 86.84       | 26.3%                          | 96,160<br>(2.42)   | 35.04             | 92.36       | 37.9%                          |
| 99213     | Office/outpatient visit for evaluation/management of established patient with low complexity      | 2771<br>(20.57) | 24.66             | 90.40       | 27.3%                          | 80,280<br>(2.02)   | 37.63             | 111.68      | 33.7%                          |
| 99214     | Office/outpatient visit for evaluation/management of established patient with moderate complexity | 959<br>(7.11)   | 48.76             | 145.01      | 33.6%                          | 76,527<br>(1.93)   | 67.54             | 165.94      | 40.7%                          |
| 90801     | Psychiatric diagnostic interview examination                                                      | 758<br>(5.62)   | 99.21             | 241.24      | 41.1%                          | 110,575<br>(2.78)  | 84.31             | 195.04      | 43.2%                          |
| 90806     | Psychotherapy, 45 mins with patient and/or family member                                          | 501<br>(3.72)   | 54.03             | 159.05      | 34.0%                          | 816,020<br>(20.54) | 54.08             | 131.40      | 41.2%                          |

|       |                                                                                                                            |               |       |        |       |                   |        |        |       |
|-------|----------------------------------------------------------------------------------------------------------------------------|---------------|-------|--------|-------|-------------------|--------|--------|-------|
| 90805 | Evaluation and management (E/M) services including continuing medical diagnostic evaluation and pharmacological management | 447<br>(3.32) | 45.20 | 182.31 | 24.8% | 24,475<br>(0.62)  | 49.67  | 128.17 | 38.8% |
| 90832 | Individual psychotherapy, 30 minutes                                                                                       | 420<br>(3.11) | 28.34 | 83.69  | 33.9% | 17,879<br>(0.45)  | 51.78  | 96.87  | 53.5% |
| 90834 | Individual psychotherapy, 45 minutes                                                                                       | 390<br>(2.89) | 45.28 | 136.41 | 33.2% | 154,569<br>(3.89) | 49.70  | 134.86 | 36.9% |
| 99212 | Office/outpatient visit for evaluation/management of established patient with problem-focused history and examination      | 333<br>(2.47) | 8.65  | 57.72  | 15.0% | 16,017<br>(0.40)  | 20.28  | 75.45  | 26.9% |
| 90792 | Psychiatric diagnostic interview (for prescribers / medical services)                                                      | 218<br>(1.62) | 88.06 | 232.68 | 37.8% | 3096<br>(0.08)    | 114.78 | 282.23 | 40.7% |

HCCI, Health Care Cost Institute; CPT, Current Procedural Terminology



**eTable 6. Top ten frequently reported CPT codes for mental health and substance abuse services provided via telehealth and non-telehealth, HCCI 2009-13**

| Mental Health and Substance Abuse (MH/SA) services - Telehealth |                                                                                                                            |        | Mental Health and Substance Abuse (MH/SA) services - Non-Telehealth |                                                                                                                                     |         |
|-----------------------------------------------------------------|----------------------------------------------------------------------------------------------------------------------------|--------|---------------------------------------------------------------------|-------------------------------------------------------------------------------------------------------------------------------------|---------|
| CPT codes                                                       | Description                                                                                                                | Number | CPT codes                                                           | Description                                                                                                                         | Number  |
| 90862                                                           | Visit focused on monitoring and prescribing of psychopharmacologic agents                                                  | 4,485  | 90806                                                               | Psychotherapy, 45 mins with patient and/or family member                                                                            | 816,020 |
| 99213                                                           | Office/outpatient visit for evaluation/management of established patient with low complexity                               | 2,771  | 90834                                                               | Individual psychotherapy, 45 minutes                                                                                                | 154,569 |
| 99214                                                           | Office/outpatient visit for evaluation/management of established patient with moderate complexity                          | 959    | 90801                                                               | Psychiatric diagnostic interview examination                                                                                        | 110,575 |
| 90801                                                           | Psychiatric diagnostic interview examination                                                                               | 758    | 90862                                                               | Visit focused on monitoring and prescribing of psychopharmacologic agents                                                           | 96,160  |
| 90806                                                           | Psychotherapy, 45 mins with patient and/or family member                                                                   | 501    | 90847                                                               | Psychotherapy services for the treatment of mental disorders                                                                        | 90,319  |
| 90805                                                           | Evaluation and management (E/M) services including continuing medical diagnostic evaluation and pharmacological management | 447    | 98960                                                               | Education/training for patient self-management by a qualified, non-physician health care professional using standardized curriculum | 83,508  |
| 90832                                                           | Individual psychotherapy, 30 minutes                                                                                       | 420    | 99213                                                               | Office/outpatient visit for evaluation/management of established patient with low complexity                                        | 80,280  |
| 90834                                                           | Individual psychotherapy, 45 minutes                                                                                       | 390    | 99214                                                               | Office/outpatient visit for evaluation/management of established patient with moderate complexity                                   | 76,527  |
| 99212                                                           | Office/outpatient visit for evaluation/management of established patient with problem-focused history and examination      | 333    | 95904                                                               | Nerve conduction, amplitude and latency/velocity study                                                                              | 72,320  |
| 90792                                                           | Psychiatric diagnostic interview (for prescribers / medical services)                                                      | 218    | 95816                                                               | Electroencephalogram (EEG) including recording awake and drowsy                                                                     | 69,496  |

HCCI, Health Care Cost Institute; CPT, Current Procedural Terminology



**eTable 7. Complete descriptions of CPT codes**

| CPT codes | Description                                                                                                                                                                                                                                                                                                                                                                                                                                                                                                                                                                                                                                                                                                                                                                                                                                                                                                                                                                                                                                 |
|-----------|---------------------------------------------------------------------------------------------------------------------------------------------------------------------------------------------------------------------------------------------------------------------------------------------------------------------------------------------------------------------------------------------------------------------------------------------------------------------------------------------------------------------------------------------------------------------------------------------------------------------------------------------------------------------------------------------------------------------------------------------------------------------------------------------------------------------------------------------------------------------------------------------------------------------------------------------------------------------------------------------------------------------------------------------|
| 90862     | CPT code 90862 is intended to refer to a visit that is focused on the monitoring and prescribing of psychopharmacologic agents. Relevant history is obtained, a mental status examination is performed, and medical decision making (i.e., assessment of treatment response and ongoing treatment formulation) occurs during such a visit providing all of the elements are documented. Psychopharmacologic agents may be initiated or adjusted during such a visit.                                                                                                                                                                                                                                                                                                                                                                                                                                                                                                                                                                        |
| 99213     | OFFICE OR OTHER OUTPATIENT VISIT FOR THE EVALUATION AND MANAGEMENT OF AN ESTABLISHED PATIENT, WHICH REQUIRES AT LEAST 2 OF THESE 3 KEY COMPONENTS: AN EXPANDED PROBLEM FOCUSED HISTORY; AN EXPANDED PROBLEM FOCUSED EXAMINATION; MEDICAL DECISION MAKING OF LOW COMPLEXITY. COUNSELING AND COORDINATION OF CARE WITH OTHER PHYSICIANS, OTHER QUALIFIED HEALTH CARE PROFESSIONALS, OR AGENCIES ARE PROVIDED CONSISTENT WITH THE NATURE OF THE PROBLEM(S) AND THE PATIENT'S AND/OR FAMILY'S NEEDS. USUALLY, THE PRESENTING PROBLEM(S) ARE OF LOW TO MODERATE SEVERITY. TYPICALLY, 15 MINUTES ARE SPENT FACE-TO-FACE WITH THE PATIENT AND/OR FAMILY.                                                                                                                                                                                                                                                                                                                                                                                           |
| 99214     | OFFICE OR OTHER OUTPATIENT VISIT FOR THE EVALUATION AND MANAGEMENT OF AN ESTABLISHED PATIENT, WHICH REQUIRES AT LEAST 2 OF THESE 3 KEY COMPONENTS: A DETAILED HISTORY; A DETAILED EXAMINATION; MEDICAL DECISION MAKING OF MODERATE COMPLEXITY. COUNSELING AND/OR COORDINATION OF CARE WITH OTHER PHYSICIANS, OTHER QUALIFIED HEALTH CARE PROFESSIONALS, OR AGENCIES ARE PROVIDED CONSISTENT WITH THE NATURE OF THE PROBLEM(S) AND THE PATIENT'S AND/OR FAMILY'S NEEDS. USUALLY, THE PRESENTING PROBLEM(S) ARE OF MODERATE TO HIGH SEVERITY. TYPICALLY, 25 MINUTES ARE SPENT FACE-TO-FACE WITH THE PATIENT AND/OR FAMILY.                                                                                                                                                                                                                                                                                                                                                                                                                    |
| 90801     | Psychiatric Diagnostic Interview Examination (CPT code 90801): An E/M service may be substituted for the initial interview procedure, including consultation CPT codes, (CPT codes 99241-99263), provided required elements of the E/M service billed are fulfilled. Consultation services require, in addition to the interview and examination, the provision of a written opinion and/or advice. E/M CPT codes do not include a psychotherapy service.                                                                                                                                                                                                                                                                                                                                                                                                                                                                                                                                                                                   |
| 90806     | Psychotherapy, 45 mins with patient and/or family member                                                                                                                                                                                                                                                                                                                                                                                                                                                                                                                                                                                                                                                                                                                                                                                                                                                                                                                                                                                    |
| 90805     | CPT codes 90805, 90807, 90809, 90811, 90813, 90815, 90817, 90819, 90822, 90824, 90827, 90829 1. These CPT codes include medical evaluation and management (E/M) services which includes continuing medical diagnostic evaluation as well as pharmacological management. Therefore, the same healthcare provider may not bill pharmacological management (90862) and an E/M service separately on the same day as a psychotherapy service. 2. When the qualified health care provider supplies other services in addition to pharmacological management at the visit, an E/M CPT code may be used. 3. HCPCS code M0064 should be used for a lesser level of drug monitoring such as simple dosage adjustment. M0064 is defined as a brief office visit for the sole purpose of monitoring or changing drug prescriptions used in the treatment of mental, psychoneurotic and personality disorders. Based on the assignment of RVUs, the work involved in M0064 is similar to CPT code 99212. Time spent is generally less than ten minutes. |

| CPT codes | Description                                                                                                                                                                                                                                                                                                                                                                                                                                                                                                                                                                                                              |
|-----------|--------------------------------------------------------------------------------------------------------------------------------------------------------------------------------------------------------------------------------------------------------------------------------------------------------------------------------------------------------------------------------------------------------------------------------------------------------------------------------------------------------------------------------------------------------------------------------------------------------------------------|
| 90832     | Individual psychotherapy, 30 minutes<br>(when performed with an evaluation & management service: 90833)                                                                                                                                                                                                                                                                                                                                                                                                                                                                                                                  |
| 90834     | Individual psychotherapy, 45 minutes<br>(when performed with an evaluation & management service: 90836)                                                                                                                                                                                                                                                                                                                                                                                                                                                                                                                  |
| 99212     | OFFICE OR OTHER OUTPATIENT VISIT FOR THE EVALUATION AND MANAGEMENT OF AN ESTABLISHED PATIENT, WHICH REQUIRES AT LEAST 2 OF THESE 3 KEY COMPONENTS: A PROBLEM FOCUSED HISTORY; A PROBLEM FOCUSED EXAMINATION; STRAIGHTFORWARD MEDICAL DECISION MAKING. COUNSELING AND/OR COORDINATION OF CARE WITH OTHER PHYSICIANS, OTHER QUALIFIED HEALTH CARE PROFESSIONALS, OR AGENCIES ARE PROVIDED CONSISTENT WITH THE NATURE OF THE PROBLEM(S) AND THE PATIENT'S AND/OR FAMILY'S NEEDS. USUALLY, THE PRESENTING PROBLEM(S) ARE SELF LIMITED OR MINOR. TYPICALLY, 10 MINUTES ARE SPENT FACE-TO-FACE WITH THE PATIENT AND/OR FAMILY. |
| 90792     | Psychiatric diagnostic interview (for prescribers / medical services)                                                                                                                                                                                                                                                                                                                                                                                                                                                                                                                                                    |
| 90847     | CPT codes 90846, 90847, 90849: CPT codes 90846 and 90847 represent psychotherapy services for the treatment of mental disorders. They should not be used when the service performed is taking a family history or E/M counseling services. E/M counseling services should be coded with the appropriate E/M CPT code according to the time involved. Family counseling does not include the supervision of or therapy with professional caretakers or staff                                                                                                                                                              |
| 98960     | Education and training for patient self-management by a qualified, non-physician health care professional using a standardized curriculum, face-to-face with the patient (could include caregiver/family) each 30 minutes; individual patient                                                                                                                                                                                                                                                                                                                                                                            |
| 95904     | Nerve conduction, amplitude and latency/velocity study, each nerve; sensory                                                                                                                                                                                                                                                                                                                                                                                                                                                                                                                                              |
| 95816     | Electroencephalogram (EEG); including recording awake and drowsy; 20-40 minutes                                                                                                                                                                                                                                                                                                                                                                                                                                                                                                                                          |

CPT, Current Procedural Terminology

**eTable 8. Number of providers, claims and average number of claims submitted by providers by CPT code for telehealth related to mental health and substance abuse services, HCCI 2009-13**

| CPT codes | Description                                                                                                                | Number of Providers | Number of Claims | Average Claims per Provider |
|-----------|----------------------------------------------------------------------------------------------------------------------------|---------------------|------------------|-----------------------------|
| 90862     | Visit focused on monitoring and prescribing of psychopharmacologic agents                                                  | 429                 | 4485             | 10.5                        |
| 99213     | Office/outpatient visit for evaluation/management of established patient with low complexity                               | 321                 | 2771             | 8.6                         |
| 99214     | Office/outpatient visit for evaluation/management of established patient with moderate complexity                          | 227                 | 959              | 4.2                         |
| 90801     | Psychiatric diagnostic interview examination                                                                               | 253                 | 758              | 3.0                         |
| 90806     | Psychotherapy, 45 mins with patient and/or family member                                                                   | 61                  | 501              | 8.2                         |
| 90805     | Evaluation and management (E/M) services including continuing medical diagnostic evaluation and pharmacological management | 70                  | 447              | 6.4                         |
| 90832     | Individual psychotherapy, 30 minutes                                                                                       | 38                  | 420              | 11.1                        |
| 90834     | Individual psychotherapy, 45 minutes                                                                                       | 35                  | 390              | 11.1                        |
| 99212     | Office/outpatient visit for evaluation/management of established patient with problem-focused history and examination      | 81                  | 333              | 4.1                         |
| 90792     | Psychiatric diagnostic interview (for prescribers / medical services)                                                      | 114                 | 218              | 1.9                         |

HCCI, Health Care Cost Institute

**eTable 9. Most frequently reported Current Procedural Terminology (CPT) codes for mental health and substance abuse services provided via telehealth, HCCI 2009-13**

| CPT codes | Number |
|-----------|--------|
| 90862     | 4,485  |
| 99213     | 2,771  |
| 99214     | 959    |
| 90801     | 758    |
| 90806     | 501    |
| 90805     | 447    |
| 90832     | 420    |
| 90834     | 390    |
| 99212     | 333    |
| 90792     | 218    |
| 99215     | 210    |
| 90791     | 181    |
| G0425     | 158    |
| 99232     | 152    |
| 90807     | 95     |
| 90837     | 85     |
| 99205     | 84     |
| 99204     | 81     |
| 99307     | 72     |
| 90808     | 67     |
| G0427     | 63     |
| 99202     | 61     |
| 90804     | 60     |
| 99308     | 58     |
| G0459     | 58     |
| Q3014     | 56     |
| 99203     | 52     |
| G0406     | 51     |
| 90847     | 46     |

| CPT codes | Number |
|-----------|--------|
| 99231     | 46     |
| 90833     | 44     |
| G0408     | 44     |
| G0426     | 41     |
| G0407     | 38     |
| 99309     | 28     |
| 99403     | 26     |
| 99211     | 25     |
| 99233     | 25     |
| H2011     | 17     |
| 90846     | 16     |
| 90839     | 15     |
| 99254     | 12     |
| M0064     | 12     |
| 90809     | *      |
| 90802     | *      |
| 90836     | *      |
| 90853     | *      |
| 90863     | *      |
| 90961     | *      |
| 96040     | *      |
| 96101     | *      |
| 96116     | *      |
| 96152     | *      |
| 99201     | *      |
| 99222     | *      |
| 99223     | *      |
| 99238     | *      |
| 99239     | *      |
| 99241     | *      |
| 99242     | *      |

| CPT codes | Number |
|-----------|--------|
| 99243     | *      |
| 99244     | *      |
| 99245     | *      |
| 99253     | *      |
| 99284     | *      |
| 99306     | *      |
| 99310     | *      |
| 99354     | *      |
| 99402     | *      |
| 99407     | *      |
| 99409     | *      |
| H0036     | *      |
| T1016     | *      |

HCCI, Health Care Cost Institute  
\* denotes cell size of less than 10 observations





**eTable 10. Average reimbursements and charges for the most frequently reported diagnosis codes for mental health and substance abuse services provided via telehealth versus non-telehealth, HCCI 2009-13**

| Diagnosis codes (ICD-9-CM) | Description                                                                                           | Telehealth        |             | Non-Telehealth    |             |
|----------------------------|-------------------------------------------------------------------------------------------------------|-------------------|-------------|-------------------|-------------|
|                            |                                                                                                       | Reimbursement, \$ | Charges, \$ | Reimbursement, \$ | Charges, \$ |
| 296.32                     | Major depressive affective disorder, recurrent episode, moderate                                      | 30.95             | 112.93      | 55.40             | 136.40      |
| 296.33                     | Major depressive affective disorder, recurrent episode, severe, without mention of psychotic behavior | 37.49             | 123.70      | 67.78             | 151.87      |
| 311.0                      | Depressive disorder, not elsewhere classified                                                         | 46.38             | 148.47      | 63.96             | 141.52      |
| 295.70                     | Schizoaffective disorder                                                                              | 29.25             | 104.17      | 51.93             | 121.30      |
| 296.80                     | Bipolar disorder                                                                                      | 31.16             | 110.55      | 59.74             | 141.81      |
| 314.01                     | Attention deficit disorder with hyperactivity                                                         | 44.89             | 175.61      | 64.09             | 160.75      |
| 300.00                     | Anxiety state                                                                                         | 50.12             | 168.08      | 60.50             | 159.36      |
| 296.89                     | Other bipolar disorders                                                                               | 45.45             | 116.16      | 55.54             | 130.58      |
| 29530                      | Paranoid type schizophrenia                                                                           | 26.03             | 81.43       | 50.20             | 111.76      |
| 29634                      | Major depressive affective disorder, recurrent episode, severe, specified as with psychotic behavior  | 29.76             | 89.11       | 59.28             | 141.31      |

**eTable 11. Number of providers, claims and average number of claims submitted by providers by ICD-9-CM code for telehealth related to mental health and substance abuse services, HCCI 2009-13**

| ICD-9 Codes | Description                                                                                           | Number of Providers | Number of Claims | Average Claims per Provider |
|-------------|-------------------------------------------------------------------------------------------------------|---------------------|------------------|-----------------------------|
| 296.32      | Major depressive affective disorder, recurrent episode, moderate                                      | 218                 | 1,200            | 5.5                         |
| 296.33      | Major depressive affective disorder, recurrent episode, severe, without mention of psychotic behavior | 166                 | 848              | 5.1                         |
| 311.0       | Depressive disorder, not elsewhere classified                                                         | 154                 | 832              | 5.4                         |
| 295.70      | Schizoaffective disorder                                                                              | 157                 | 737              | 4.7                         |
| 296.80      | Bipolar disorder                                                                                      | 127                 | 425              | 3.3                         |
| 314.01      | Attention deficit disorder with hyperactivity                                                         | 72                  | 419              | 5.8                         |
| 300.00      | Anxiety state                                                                                         | 92                  | 409              | 4.4                         |
| 296.89      | Other bipolar disorders                                                                               | 86                  | 390              | 4.5                         |
| 295.30      | Paranoid type schizophrenia                                                                           | 94                  | 362              | 3.9                         |
| 296.34      | Major depressive affective disorder, recurrent episode, severe, specified as with psychotic behavior  | 101                 | 360              | 3.6                         |

HCCI, Health Care Cost Institute

**eTable 12. Complete description of ICD-9-CM diagnosis codes**

| Diagnosis codes | Description                                                                                                                     |
|-----------------|---------------------------------------------------------------------------------------------------------------------------------|
| 296.32          | Recurr depr psychos-mod (Major depressive affective disorder, recurrent episode, moderate)                                      |
| 296.33          | Recur depr psych-severe (Major depressive affective disorder, recurrent episode, severe, without mention of psychotic behavior) |
| 311.0           | Depressive disorder, not elsewhere classified                                                                                   |
| 295.70          | Schizoaffective dis NOS (Schizoaffective disorder, unspecified)                                                                 |
| 296.80          | Bipolar disorder NOS (Bipolar disorder, unspecified)                                                                            |
| 314.01          | Attn deficit w hyperact (Attention deficit disorder with hyperactivity)                                                         |
| 300.00          | Anxiety state NOS (Anxiety state, unspecified)                                                                                  |
| 296.89          | Bipolar disorder NEC (Other bipolar disorders)                                                                                  |
| 295.30          | Paranoid schizo-unspec (Paranoid type schizophrenia, unspecified)                                                               |
| 296.34          | Rec depr psych-psychotic (Major depressive affective disorder, recurrent episode, severe, specified as with psychotic behavior) |
| 309.28          | Adjust dis w anxiety/dep (Adjustment disorder with mixed anxiety and depressed mood)                                            |
| 300.02          | Generalized anxiety dis (Generalized anxiety disorder)                                                                          |
| 300.4           | Dysthymic disorder                                                                                                              |
| 299.00          | Autistic disord-current (Autistic disorder, current or active state)                                                            |
| 327.23          | Obstructive sleep apnea (Obstructive sleep apnea (adult)(pediatric))                                                            |
| 309.0           | Adjustmnt dis w depressn (Adjustment disorder with depressed mood)                                                              |

**eTable 13. Top ten frequently reported diagnosis codes (ICD-9-CM) for mental health and substance abuse services provided via telehealth and non-telehealth, HCCI 2009-13**

| Telehealth                 |                                                                                                       |        | Non-Telehealth             |                                                                                                       |         |
|----------------------------|-------------------------------------------------------------------------------------------------------|--------|----------------------------|-------------------------------------------------------------------------------------------------------|---------|
| Diagnosis codes (ICD-9-CM) | Description                                                                                           | Number | Diagnosis codes (ICD-9-CM) | Description                                                                                           | Number  |
| 296.32                     | Major depressive affective disorder, recurrent episode, moderate                                      | 1,200  | 309.28                     | Adjustment disorder with mixed anxiety and depressed mood                                             | 168,296 |
| 296.33                     | Major depressive affective disorder, recurrent episode, severe, without mention of psychotic behavior | 848    | 311.0                      | Depressive disorder, not elsewhere classified                                                         | 137,223 |
| 311.0                      | Depressive disorder, not elsewhere classified                                                         | 832    | 300.02                     | Generalized anxiety disorder                                                                          | 133,438 |
| 295.70                     | Schizoaffective disorder                                                                              | 737    | 296.32                     | Major depressive affective disorder, recurrent episode, moderate                                      | 128,411 |
| 296.80                     | Bipolar disorder                                                                                      | 425    | 300.4                      | Dysthymic disorder                                                                                    | 118,346 |
| 314.01                     | Attention deficit disorder with hyperactivity                                                         | 419    | 299.00                     | Autistic disorder, current or active state                                                            | 93,377  |
| 300.00                     | Anxiety state                                                                                         | 409    | 327.23                     | Obstructive sleep apnea (adult)(pediatric)                                                            | 88,148  |
| 296.89                     | Other bipolar disorders                                                                               | 390    | 296.33                     | Major depressive affective disorder, recurrent episode, severe, without mention of psychotic behavior | 87,990  |
| 295.30                     | Paranoid type schizophrenia                                                                           | 362    | 300.00                     | Anxiety state                                                                                         | 74,125  |
| 296.34                     | Major depressive affective disorder, recurrent episode, severe, specified as with psychotic behavior  | 360    | 309.0                      | Adjustment disorder with depressed mood                                                               | 62,142  |

HCCI, Health Care Cost Institute
